# Supplementary material for: Bismuth oxyhalides: synthesis, structure and photoelectrochemical activity
Source: PubMed Central journal article supplement (PMC6016733; doi:10.1039/c6sc00389c), 2016-03-09
Supplement: SC-007-C6SC00389C-s001.pdf [file SC-007-C6SC00389C-s001.pdf]

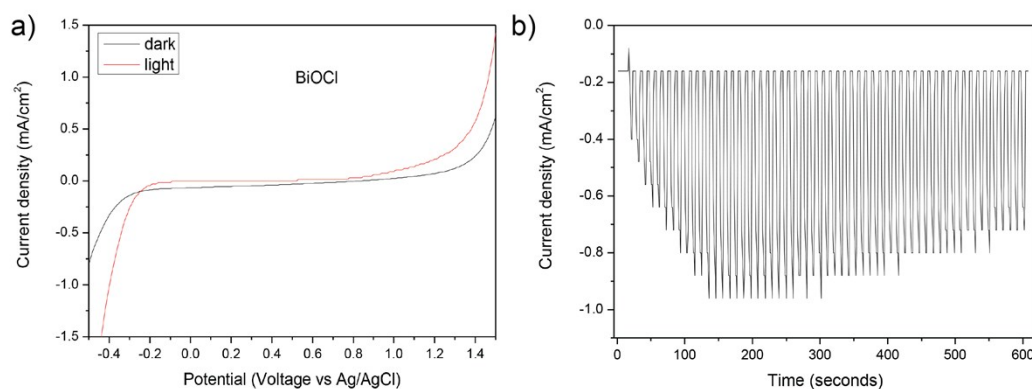

**Figure 1: a) The current-voltage behavior of the AACVD grown BiOCl film under 100 mW/cm<sup>2</sup> illumination in 0.5M Na<sub>2</sub>SO<sub>4</sub> electrolyte. b) The stability of the BiOCl film at an applied voltage of -0.4 V vs Ag/AgCl.**

$$\eta/\% = \left[ \frac{|J_{ph}| (mAcm^{-2}) \times (1.23 - |V_b|) / (V)}{P_{total} (mAcm^{-2})} \right]_{AM1.5G} \times 100$$

**Equation 1: was used to determine the applied bias-photon-to-current conversion efficiency for the three BiOX films grown via AACVD.**
